# Supplementary material for: Chemo-Enzymatic Synthesis of Silybin and 2,3-Dehydrosilybin Dimers
Source: PubMed Central journal article supplement (PMC6271273; doi:10.3390/molecules19044115), 2014-04-02
Supplement: molecules-19-04115-s001.pdf [file molecules-19-04115-s001.pdf]

# Supplementary Materials

**Table S1.** <sup>13</sup>C-NMR data of prepared compounds (δ<sub>C</sub>, ppm).

| Atom #        | Compound        |                |                |                |                |                |                 |                 |
|---------------|-----------------|----------------|----------------|----------------|----------------|----------------|-----------------|-----------------|
|               | 2b <sup>1</sup> | 3 <sup>2</sup> | 4 <sup>2</sup> | 5 <sup>2</sup> | 8 <sup>1</sup> | 9 <sup>1</sup> | 10 <sup>3</sup> | 11 <sup>1</sup> |
| <b>2</b>      | 82.48           | 82.49          | 82.45          | 82.52          | 82.74          | 82.72          | 82.74           | 82.77           |
|               | 82.53           |                |                | 82.47          |                |                | 82.71           | 82.73           |
| <b>3</b>      | 71.55           | 71.43          | 71.50          | 71.52          | 71.50          | 71.58          | 71.57           | 71.60           |
|               | 71.47           |                |                | 71.44          |                |                | 71.50           | 71.52           |
| <b>4</b>      | 197.73          | 197.69         | 197.62         | 197.78         | 198.44         | 198.41         | 198.40          | 198.44          |
|               | 197.76          |                |                | 197.75         |                |                | 198.38          | 198.41          |
| <b>4a</b>     | 100.51          | 100.48         | 100.45         | 100.52         | 101.55         | 101.56         | 101.55          | 101.58          |
| <b>5</b>      | 163.36          | 163.31         | 163.33         | 163.35         | 162.97         | 162.99         | 162.98          | 163.00          |
| <b>6</b>      | 96.15           | 96.10          | 96.12          | 96.12          | 95.77          | 95.78          | 95.77           | 95.78           |
| <b>7</b>      | 166.93          | 166.84         | 166.95         | 166.86         | 166.50         | 166.52         | 166.50          | 166.54          |
| <b>8</b>      | 95.10           | 95.05          | 95.08          | 95.08          | 94.62          | 94.63          | 94.62           | 94.59           |
| <b>8a</b>     | 162.49          | 162.47         | 162.45         | 162.50         | 162.44         | 162.43         | 162.43          | 162.46          |
|               | 162.50          |                |                | 162.49         |                |                | 162.41          | 162.44          |
| <b>10</b>     | 75.06           | 75.00          | 75.02          | 75.04          | 78.15          | 78.18          | 78.17           | 78.19           |
|               | 75.04           |                |                | 75.02          |                |                | 78.16           | 78.16           |
| <b>11</b>     | 75.98           | 75.94          | 75.95          | 75.97          | 75.88          | 75.90          | 75.88           | 75.90           |
| <b>12a</b>    | 143.24          | 143.22         | 143.20         | 143.26         | 143.31         | 143.30         | 143.30          | 143.32          |
|               | 143.27          |                |                | 143.24         |                |                | 143.28          | 143.30          |
| <b>13</b>     | 116.83          | 116.67         | 116.77         | 116.83         | 116.65         | 116.72         | 116.70          | 116.72          |
|               | 116.71          |                |                | 116.72         |                |                | 116.63          | 116.66          |
| <b>14</b>     | 130.59          | 130.50         | 130.55         | 130.58         | 129.98         | 129.95         | 129.93          | 129.90          |
|               | 130.55          |                |                | 130.54         |                |                | 129.89          | 129.85          |
| <b>15</b>     | 121.38          | 121.53         | 121.35         | 121.60         | 121.41         | 121.26         | 121.39          | 121.42          |
|               | 121.59          |                |                | 121.41         |                |                | 121.24          | 121.26          |
| <b>16</b>     | 116.46          | 116.37         | 116.42         | 116.46         | 116.36         | 116.42         | 116.40          | 116.43          |
|               | 116.40          |                |                | 116.41         |                |                | 116.36          | 116.38          |
| <b>16a</b>    | 143.11          | 143.10         | 143.06         | 143.13         | 143.75         | 143.73         | 143.74          | 143.76          |
|               | 143.14          |                |                | 143.10         |                |                | 143.71          | 143.73          |
| <b>17</b>     | 126.64          | 126.61         | 126.62         | 126.64         | 127.53         | 127.55         | 127.54          | 127.55          |
|               | 126.63          |                |                |                |                |                |                 |                 |
| <b>18</b>     | 111.71          | 111.78         | 111.74         | 111.75         | 111.78         | 111.73         | 111.80          | 111.79          |
|               | 111.76          |                |                | 111.70         |                |                | 111.75          | 111.73          |
| <b>19</b>     | 147.84          | 147.79         | 147.80         | 147.82         | 147.67         | 147.70         | 147.68          | 147.70          |
|               | 147.83          |                |                | 147.81         |                |                | 147.67          | 147.69          |
| <b>20</b>     | 147.40          | 147.36         | 147.36         | 147.37         | 147.07         | 147.07         | 147.07          | 147.08          |
|               | 147.41          |                |                |                |                |                |                 | 147.69          |
| <b>21</b>     | 115.45          | 115.44         | 115.43         | 115.44         | 115.37         | 115.37         | 115.37          | 115.39          |
|               | 115.46          |                |                |                |                |                |                 | 115.37          |
| <b>22</b>     | 120.64          | 120.64         | 120.62         | 120.65         | 120.57         | 120.57         | 120.55          | 120.57          |
|               | 120.67          |                |                |                |                |                |                 |                 |
| <b>23</b>     | 62.45           | 62.42          | 62.42          | 62.46          | 60.23          | 60.23          | 60.22           | 60.24           |
| <b>19-MeO</b> | 55.73           | 55.73          | 55.73          | 55.73          | 55.75          | 55.76          | 55.76           | 55.76           |
| <b>1'</b>     | 172.63          | 172.58         | 172.59         | 172.64         | 69.55          | 69.56          | 69.55           | 69.74           |
| <b>2'</b>     | 32.26           | 33.22          | 33.22          | 33.24          | 136.13         | 136.14         | 136.12          | 136.63          |
| <b>3'</b>     | 24.41           | 24.36          | 24.36          | 24.40          | 127.98         | 127.99         | 127.96          | 127.06          |
| <b>4'</b>     | 28.46           | 28.42          | 28.43          | 28.47          |                |                |                 | 127.61          |

Table S1. Cont.

| Atom # | Compound        |                |                |                |                |                |                 |                 |
|--------|-----------------|----------------|----------------|----------------|----------------|----------------|-----------------|-----------------|
|        | 2b <sup>1</sup> | 3 <sup>2</sup> | 4 <sup>2</sup> | 5 <sup>2</sup> | 8 <sup>1</sup> | 9 <sup>1</sup> | 10 <sup>3</sup> | 11 <sup>1</sup> |
| 5'     | 28.69           | 28.66          | 28.66          | 28.71          |                |                |                 | 128.86          |
| 6'     | 28.85           | 28.85          | 28.85          | 28.90          |                |                |                 |                 |
| 7'     | 28.83           |                |                |                |                |                |                 |                 |
| 8'     | 28.65           |                |                |                |                |                |                 |                 |
| 9'     | 28.38           |                |                |                |                |                |                 |                 |
| 10'    | 24.10           |                |                |                |                |                |                 |                 |
| 11'    | 33.09           |                |                |                |                |                |                 |                 |
| 12'    | 170.48          |                |                |                |                |                |                 |                 |
| 1''    | 141.30          |                |                |                |                |                |                 |                 |
| 2''    | 98.01           |                |                |                |                |                |                 |                 |

<sup>1</sup> Bruker Avance III 700 (700.13 MHz for <sup>1</sup>H, 176.05 MHz for <sup>13</sup>C, DMSO-*d*<sub>6</sub>, 303.2 K); <sup>2</sup> Bruker Avance III 600 (600.23 MHz for <sup>1</sup>H, 150.94 MHz for <sup>13</sup>C, DMSO-*d*<sub>6</sub>, 303.2 K); <sup>3</sup> Bruker Avance III 400 (400.00 MHz for <sup>1</sup>H, 100.58 MHz for <sup>13</sup>C, DMSO-*d*<sub>6</sub>, 303.2 K).

Table S2. <sup>1</sup>H-NMR data of prepared compounds.

| Atom # | 2b <sup>1</sup>      |                |                       | 3 <sup>3</sup>       |                |                       | 4 <sup>2</sup>       |                |                       | 5 <sup>2</sup>       |                |                       |
|--------|----------------------|----------------|-----------------------|----------------------|----------------|-----------------------|----------------------|----------------|-----------------------|----------------------|----------------|-----------------------|
|        | δ <sub>H</sub> [ppm] | m <sup>#</sup> | J <sub>H-H</sub> [Hz] | δ <sub>H</sub> [ppm] | m <sup>#</sup> | J <sub>H-H</sub> [Hz] | δ <sub>H</sub> [ppm] | m <sup>#</sup> | J <sub>H-H</sub> [Hz] | δ <sub>H</sub> [ppm] | m <sup>#</sup> | J <sub>H-H</sub> [Hz] |
| 2      | 5.091                | d              | 11.2                  | 5.088                | d              | 11.2                  | 5.086                | d              | 11.2                  | 5.088                | d              | 11.2                  |
| 3      | 4.602                | dd             | 5.9, 11.2             | 4.597                | dd             | 6.2, 11.2             | 4.582                | dd             | 6.0, 11.2             | 4.598                | m              | -                     |
|        | 4.588                | dd             | 5.9, 11.2             |                      |                |                       |                      |                |                       |                      |                |                       |
| 6      | 5.924                | d              | 2.0                   | 5.913                | d              | 2.1                   | 5.910                | d              | 2.1                   | 5.912                | m              | -                     |
| 8      | 5.881                | d              | 2.0                   | 5.866                | d              | 2.1                   | 5.868                | d              | 2.1                   | 5.868                | m              | -                     |
|        | 5.874                | d              | 2.0                   |                      |                |                       |                      |                |                       |                      |                |                       |
| 10     | 4.514                | m              | -                     | 4.506                | ddd            | 2.8, 5.0, 7.9         | 4.496                | ddd            | 2.8, 5.0, 7.9         | 4.504                | m              | -                     |
|        | 4.503                | m              | -                     |                      |                |                       |                      |                |                       |                      |                |                       |
| 11     | 4.928                | d              | 7.9                   | 4.920                | d              | 7.9                   | 4.922                | d              | 7.9                   | 4.922                | d              | 8.0                   |
| 13     | 7.106                | d              | 1.9                   | 7.108                | d              | 2.0                   | 7.100                | d              | 2.0                   | 7.112                | d              | 2.0                   |
|        | 7.117                | d              | 1.9                   |                      |                |                       |                      |                |                       | 7.102                | d              | 2.0                   |
| 15     | 7.034 <sup>J</sup>   | dd             | 1.9, 8.3              | 7.023                | dd             | 2.0, 8.3              | 7.029                | dd             | 2.0, 8.3              | 7.029                | dd             | 2.0, 8.3              |
|        | 7.027 <sup>J</sup>   | dd             | 1.9, 8.2              |                      |                |                       |                      |                |                       | 7.022                | dd             | 2.0, 8.3              |
| 16     | 6.984                | d              | 8.3                   | 6.975                | d              | 8.3                   | 6.979                | d              | 8.3                   | 6.981                | d              | 8.3                   |
|        | 6.979                | d              | 8.2                   |                      |                |                       |                      |                |                       | 6.977                | d              | 8.3                   |
| 18     | 7.023 <sup>J</sup>   | d              | 1.8                   | 7.014                | d              | 1.9                   | 7.017                | d              | 2.0                   | 7.01*                | m              | -                     |
|        | 7.020 <sup>J</sup>   | d              | 1.8                   |                      |                |                       |                      |                |                       |                      |                |                       |
| 21     | 6.806                | d              | 8.1                   | 6.799                | d              | 8.1                   | 6.800                | d              | 8.0                   | 6.854                | dd             | 1.9, 8.1              |
| 22     | 6.860                | dd             | 1.8, 8.1              | 6.855                | dd             | 1.9, 8.1              | 6.855                | dd             | 2.0, 8.0              | 6.797                | d              | 8.1                   |
|        |                      |                |                       |                      |                |                       |                      |                |                       | 6.796                | d              | 8.1                   |
| 23     | 4.133                | dd             | 2.5, 12.4             | 4.126                | dd             | 2.8, 12.4             | 4.126                | dd             | 2.8, 12.4             | 4.928                | dd             | 5.0, 12.5             |
|        | 3.934                | dd             | 4.9, 12.4             | 3.934                | dd             | 5.0, 12.4             | 3.933                | dd             | 5.0, 12.4             | 4.120                | dd             | 2.6, 12.5             |
| 3-OH   | 5.091                | d              | 5.9                   | 5.774                | d              | 6.2                   | 5.770                | d              | 6.0                   | 5.794                | d              | 6.2                   |

Table S2. Cont.

| Atom # | 2b <sup>1</sup>                      |                |                       | 3 <sup>3</sup>            |                |                       | 4 <sup>2</sup>            |                |                       | 5 <sup>2</sup>            |                |                       |
|--------|--------------------------------------|----------------|-----------------------|---------------------------|----------------|-----------------------|---------------------------|----------------|-----------------------|---------------------------|----------------|-----------------------|
|        | $\delta_{\text{H}}$ [ppm]            | m <sup>#</sup> | $J_{\text{H-H}}$ [Hz] | $\delta_{\text{H}}$ [ppm] | m <sup>#</sup> | $J_{\text{H-H}}$ [Hz] | $\delta_{\text{H}}$ [ppm] | m <sup>#</sup> | $J_{\text{H-H}}$ [Hz] | $\delta_{\text{H}}$ [ppm] | m <sup>#</sup> | $J_{\text{H-H}}$ [Hz] |
| 5-OH   | 11.876                               | s              | -                     | 11.859                    | s              | -                     | 11.863                    | s              | -                     | 11.871                    | s              | -                     |
| 7-OH   | 10.861                               | s              | -                     | 10.794                    | s              | -                     | 10.813                    | s              | -                     | 10.818                    | s              | -                     |
| 19-OMe | 3.777                                | s              | -                     | 3.769                     | s              | -                     | 3.772                     | s              | -                     | 10.814                    | s              | -                     |
|        | 3.774                                | s              | -                     |                           |                |                       |                           |                |                       | 3.770                     | s              | -                     |
| 20-OH  | 9.192                                | s              | -                     | 9.157                     | s              | -                     | 9.157                     | s              | -                     | 9.185                     | s              | -                     |
|        |                                      |                |                       |                           |                |                       |                           |                |                       | 9.184                     | s              | -                     |
| 2'     | 2.318                                | dt             | 16.0, 7.5             | 2.293                     | m              | -                     | 2.294                     | m              | -                     | 2.296                     | m              | -                     |
|        | 2.284                                | dt             | 16.0, 7.5             |                           |                |                       |                           |                |                       |                           |                |                       |
| 3'     | 1.49 <sup>H</sup>                    | m              | -                     | 1.490                     | m              | -                     | 1.491                     | m              | -                     | 1.488                     | m              | -                     |
| 4'     | 1.24 <sup>H</sup>                    | m              | -                     | 1.235                     | m              | -                     | 1.235                     | m              | -                     | 1.23 <sup>H</sup>         | m              | -                     |
| 5'     |                                      |                |                       |                           |                |                       |                           |                |                       |                           |                |                       |
| 6'     | 1.23 <sup>H</sup> -1.25 <sup>H</sup> | m              | -                     |                           |                |                       |                           |                |                       |                           |                |                       |
| 7'     |                                      |                |                       |                           |                |                       |                           |                |                       |                           |                |                       |
| 8'     |                                      |                |                       |                           |                |                       |                           |                |                       |                           |                |                       |
| 9'     | 1.25 <sup>H</sup>                    | m              | -                     |                           |                |                       |                           |                |                       |                           |                |                       |
| 10'    | 1.54 <sup>H</sup>                    | m              | -                     |                           |                |                       |                           |                |                       |                           |                |                       |
| 11''   | 2.403                                | t              | 7.3                   |                           |                |                       |                           |                |                       |                           |                |                       |
| 1''    | 7.207                                | dd             | 6.2, 14.0             |                           |                |                       |                           |                |                       |                           |                |                       |
| 2''    | 4.875                                | dd             | 14.0, 1.5             |                           |                |                       |                           |                |                       |                           |                |                       |
|        | 4.630                                | dd             | 6.2, 1.5              |                           |                |                       |                           |                |                       |                           |                |                       |

J—J-RES readout; H—HSQC readout; <sup>1</sup> Bruker Avance III 700 (700.13 MHz for <sup>1</sup>H, 176.05 MHz for <sup>13</sup>C, DMSO-*d*<sub>6</sub>, 303.2 K); <sup>2</sup> Bruker Avance III 600 (600.23 MHz for <sup>1</sup>H, 150.94 MHz for <sup>13</sup>C, DMSO-*d*<sub>6</sub>, 303.2 K); <sup>3</sup> Bruker Avance III 400 (400.00 MHz for <sup>1</sup>H, 100.58 MHz for <sup>13</sup>C, DMSO-*d*<sub>6</sub>, 303.2 K).

Table S3. <sup>1</sup>H-NMR data of prepared compounds.

| Atom #    | <b>8</b> <sup>1</sup>     |     |                       | <b>9</b> <sup>1</sup>     |     |                       | <b>10</b> <sup>3</sup>    |     |                       | <b>11</b> <sup>1</sup>    |     |                       |
|-----------|---------------------------|-----|-----------------------|---------------------------|-----|-----------------------|---------------------------|-----|-----------------------|---------------------------|-----|-----------------------|
|           | $\delta_{\text{H}}$ [ppm] | m # | $J_{\text{H-H}}$ [Hz] | $\delta_{\text{H}}$ [ppm] | m # | $J_{\text{H-H}}$ [Hz] | $\delta_{\text{H}}$ [ppm] | m # | $J_{\text{H-H}}$ [Hz] | $\delta_{\text{H}}$ [ppm] | m # | $J_{\text{H-H}}$ [Hz] |
| <b>2</b>  | 5.131                     | d   | 11.3                  | 5.132                     | d   | 11.3                  | 5.132                     | d   | 11.3                  | 5.134                     | d   | 11.3                  |
| <b>3</b>  | 4.669                     | dd  | 6.3, 11.3             | 4.659                     | dd  | 6.3, 11.3             | 4.668                     | dd  | 6.3, 11.3             | 4.666                     | m   | -                     |
|           |                           |     |                       |                           |     |                       | 4.655                     | dd  | 6.3, 11.3             |                           |     |                       |
| <b>6</b>  | 6.184                     | d   | 2.2                   | 6.118                     | d   | 2.2                   | 6.187                     | d   | 2.0                   | 6.19 <sup>H</sup>         | m   | -                     |
| <b>8</b>  | 6.157                     | d   | 2.2                   | 6.164                     | d   | 2.2                   | 6.164                     | d   | 2.0                   | 6.17 <sup>H</sup>         | m   | -                     |
|           |                           |     |                       |                           |     |                       | 6.157                     | d   | 2.0                   |                           |     |                       |
| <b>10</b> | 4.172                     | ddd | 2.5, 4.5, 7.9         | 4.166                     | ddd | 2.5, 4.7, 7.8         | 4.173                     | m   | -                     | 4.17 <sup>H</sup>         | m   | -                     |
|           |                           |     |                       |                           |     |                       | 4.165                     | m   |                       |                           |     |                       |
| <b>11</b> | 4.910                     | d   | 7.9                   | 4.913                     | d   | 7.8                   | 4.913                     | d   | 8.0                   | 4.911                     | d   | 7.8                   |
| <b>13</b> | 7.089                     | d   | 2.0                   | 7.086                     | d   | 2.0                   | 7.090                     | d   | 2.0                   | 7.093                     | d   | 1.9                   |
|           |                           |     |                       |                           |     |                       | 7.084                     | d   | 2.0                   | 7.087                     |     |                       |
| <b>15</b> | 7.013                     | dd  | 2.0, 8.3              | 7.019                     | dd  | 2.0, 8.3              | 7.020                     | m   | -                     | 7.02 <sup>H</sup>         | m   | -                     |
|           |                           |     |                       |                           |     |                       | 7.015                     | m   |                       |                           |     |                       |
| <b>16</b> | 6.970                     | d   | 8.3                   | 6.975                     | d   | 8.3                   | 6.972                     | d   | 8.4                   | 6.974                     | d   | 8.3                   |
|           |                           |     |                       |                           |     |                       | 6.969                     | d   | 8.2                   | 6.972                     | d   |                       |
| <b>18</b> | 7.010                     | d   | 1.9                   | 7.016                     | d   | 1.8                   | 7.015                     | d   | 1.9                   | 7.01 <sup>H</sup>         | m   | -                     |
|           |                           |     |                       |                           |     |                       | 7.011                     | d   | 1.9                   |                           |     |                       |
| <b>21</b> | 6.802                     | d   | 8.2                   | 6.804                     | d   | 8.1                   | 6.802                     | d   | 8.1                   | 6.804                     | d   | 8.0                   |
|           |                           |     |                       |                           |     |                       |                           |     |                       | 6.803                     | d   |                       |

Table S3. Cont.

| Atom #        | <b>8</b> <sup>1</sup>     |     |                       | <b>9</b> <sup>1</sup>     |     |                       | <b>10</b> <sup>3</sup>    |     |                       | <b>11</b> <sup>1</sup>    |     |                       |
|---------------|---------------------------|-----|-----------------------|---------------------------|-----|-----------------------|---------------------------|-----|-----------------------|---------------------------|-----|-----------------------|
|               | $\delta_{\text{H}}$ [ppm] | m # | $J_{\text{H-H}}$ [Hz] | $\delta_{\text{H}}$ [ppm] | m # | $J_{\text{H-H}}$ [Hz] | $\delta_{\text{H}}$ [ppm] | m # | $J_{\text{H-H}}$ [Hz] | $\delta_{\text{H}}$ [ppm] | m # | $J_{\text{H-H}}$ [Hz] |
| <b>22</b>     | 6.861                     | d   | 1.9, 8.2              | 6.865                     | dd  | 1.8, 8.1              | 6.865                     | dd  | 8.1, 1.9              | 6.864                     | m   | -                     |
| <b>23</b>     | 3.541                     | ddd | 2.5, 4.9, 12.3        | 3.543                     | ddd | 2.5, 5.0, 12.3        | 3.544                     | ddd | 2.6, 5.0, 12.2        | 3.54 <sup>H</sup>         | m   | -                     |
|               | 3.347                     | ddd | 4.5, 5.8, 12.3        | 3.350                     | ddd | 4.7, 5.7, 12.3        | 3.351                     | ddd | 4.7, 5.8, 12.2        | 3.35 <sup>H</sup>         | m   | -                     |
| <b>3-OH</b>   | 5.849                     | d   | 6.3                   | 5.854                     | d   | 6.3                   | 5.842                     | d   | 6.3                   | 5.857                     | d   | 6.3                   |
| <b>5-OH</b>   | 11.819                    | s   | -                     | 11.824                    | s   | -                     | 11.818                    | s   | -                     | 11.826                    | s   | -                     |
| <b>19-OMe</b> | 3.775                     | s   | -                     | 3.778                     | s   | -                     | 3.778                     | s   | -                     | 3.776                     | s   | -                     |
| <b>20-OH</b>  | 9.120                     | s   | -                     | 9.122                     | s   | -                     | 9.108                     | s   | -                     | 9.122                     | s   | -                     |
|               |                           |     |                       |                           |     |                       | 9.106                     | s   | -                     |                           |     |                       |
| <b>23-OH</b>  | 4.931                     | dd  | 4.9, 5.8              | 4.938                     | dd  | 5.0, 5.7              | 4.923                     | dd  | 5.0, 5.8              | 4.936                     | m   |                       |
| <b>1'</b>     | 5.171                     | s   | -                     | 5.176                     | s   | -                     | 5.175                     | s   | -                     | 5.178                     | s   | -                     |
| <b>3'</b>     | 7.433                     | s   | -                     | 7.437                     | s   | -                     | 7.444                     | s   | -                     | 7.48 <sup>H</sup>         | m   | -                     |
|               |                           |     |                       |                           |     |                       | 7.435                     | s   |                       |                           |     |                       |
| <b>4'</b>     |                           |     |                       |                           |     |                       |                           |     |                       | 7.400                     | m   | -                     |
| <b>5'</b>     |                           |     |                       | 5.854                     | d   | 6.3                   |                           |     |                       | 7.410                     | m   | -                     |

J—J-RES readout; H—HSQC readout; <sup>1</sup> Bruker Avance III 700 (700.13 MHz for <sup>1</sup>H, 176.05 MHz for <sup>13</sup>C, DMSO-*d*<sub>6</sub>, 303.2 K); <sup>2</sup> Bruker Avance III 600 (600.23 MHz for <sup>1</sup>H, 150.94 MHz for <sup>13</sup>C, DMSO-*d*<sub>6</sub>, 303.2 K); <sup>3</sup> Bruker Avance III 400 (400.00 MHz for <sup>1</sup>H, 100.58 MHz for <sup>13</sup>C, DMSO-*d*<sub>6</sub>, 303.2 K).

**<sup>1</sup>H-NMR data of prepared compound 7**

<sup>1</sup>H-NMR (600.13 MHz, CD<sub>3</sub>OD, 20 °C) δ: 1.31<sup>T</sup> (m, H-4', H-9'), 1.62<sup>T</sup> (m, H-3', H-10'), 2.356 (m, H-2', H-11'), 3.910 (s, 19-OMe), 3.981 (m, H-23u), 4.405 (m, H-23d), 4.448 (m, H-10), 4.96<sup>H</sup> (m, H-11), 6.200 (br s, H-6), 6.439 (br s, H-8), 6.887 (d, *J* = 8.1 Hz, H-21), 6.943 (dd, *J* = 1.9, 8.1 Hz, H-22), 7.055 (d, *J* = 1.9 Hz, H-18), 7.080 (m, H-16), 7.842 (m, H-15), 7.898 (m, H-13).

<sup>T</sup> TOCSY readout
